# Supplementary material for: Lanthanide complexes with aromatic o-phosphorylated ligands: synthesis, structure elucidation and photophysical properties
Source: Royal Society of Chemistry journal article supplement (doi:10.1039/c3dt52600c), 2013-10-24
Supplement: c3dt52600c.pdf [file c3dt52600c.pdf]

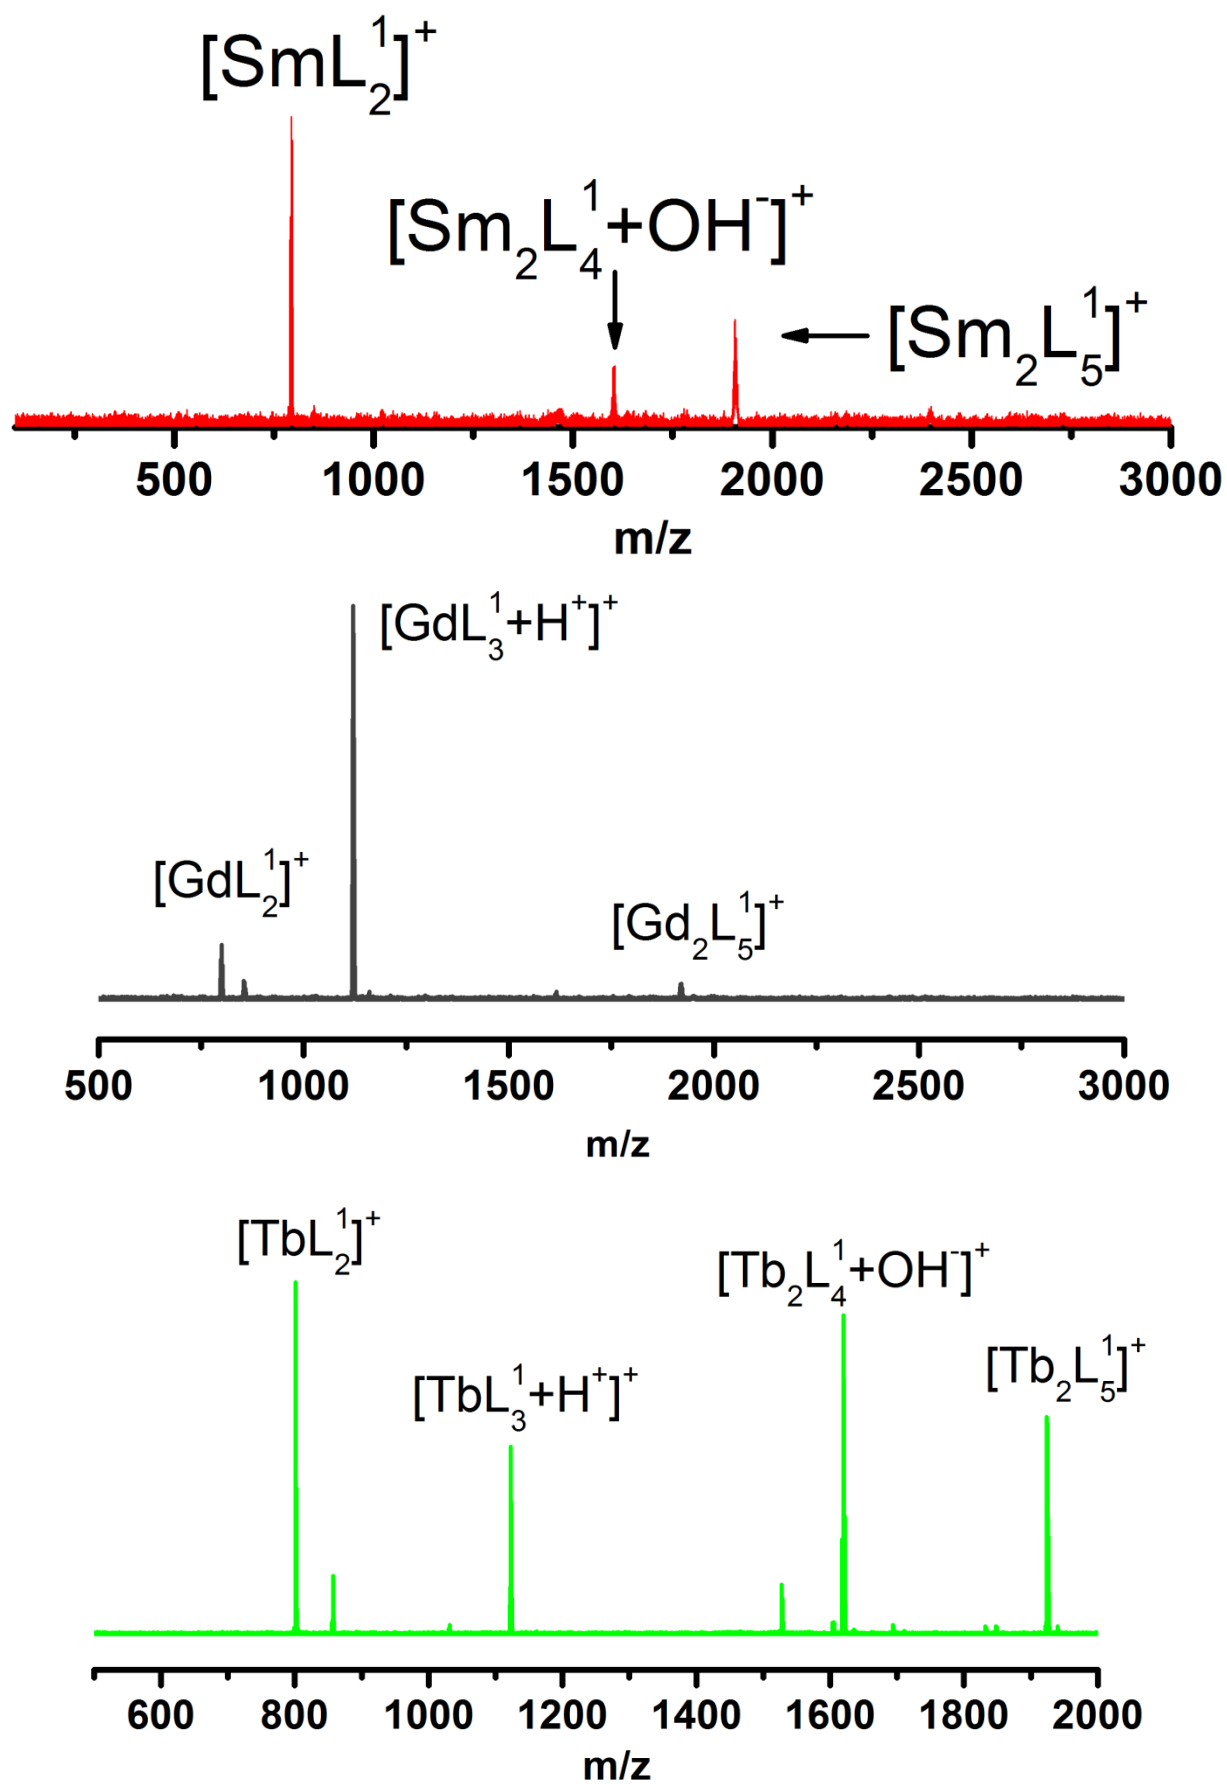

Fig.S1. LDI-TOF spectra of SmL<sub>3</sub><sup>1+</sup> (above), EuL<sub>3</sub><sup>1+</sup> (middle) and GdL<sub>3</sub><sup>1+</sup> (below)

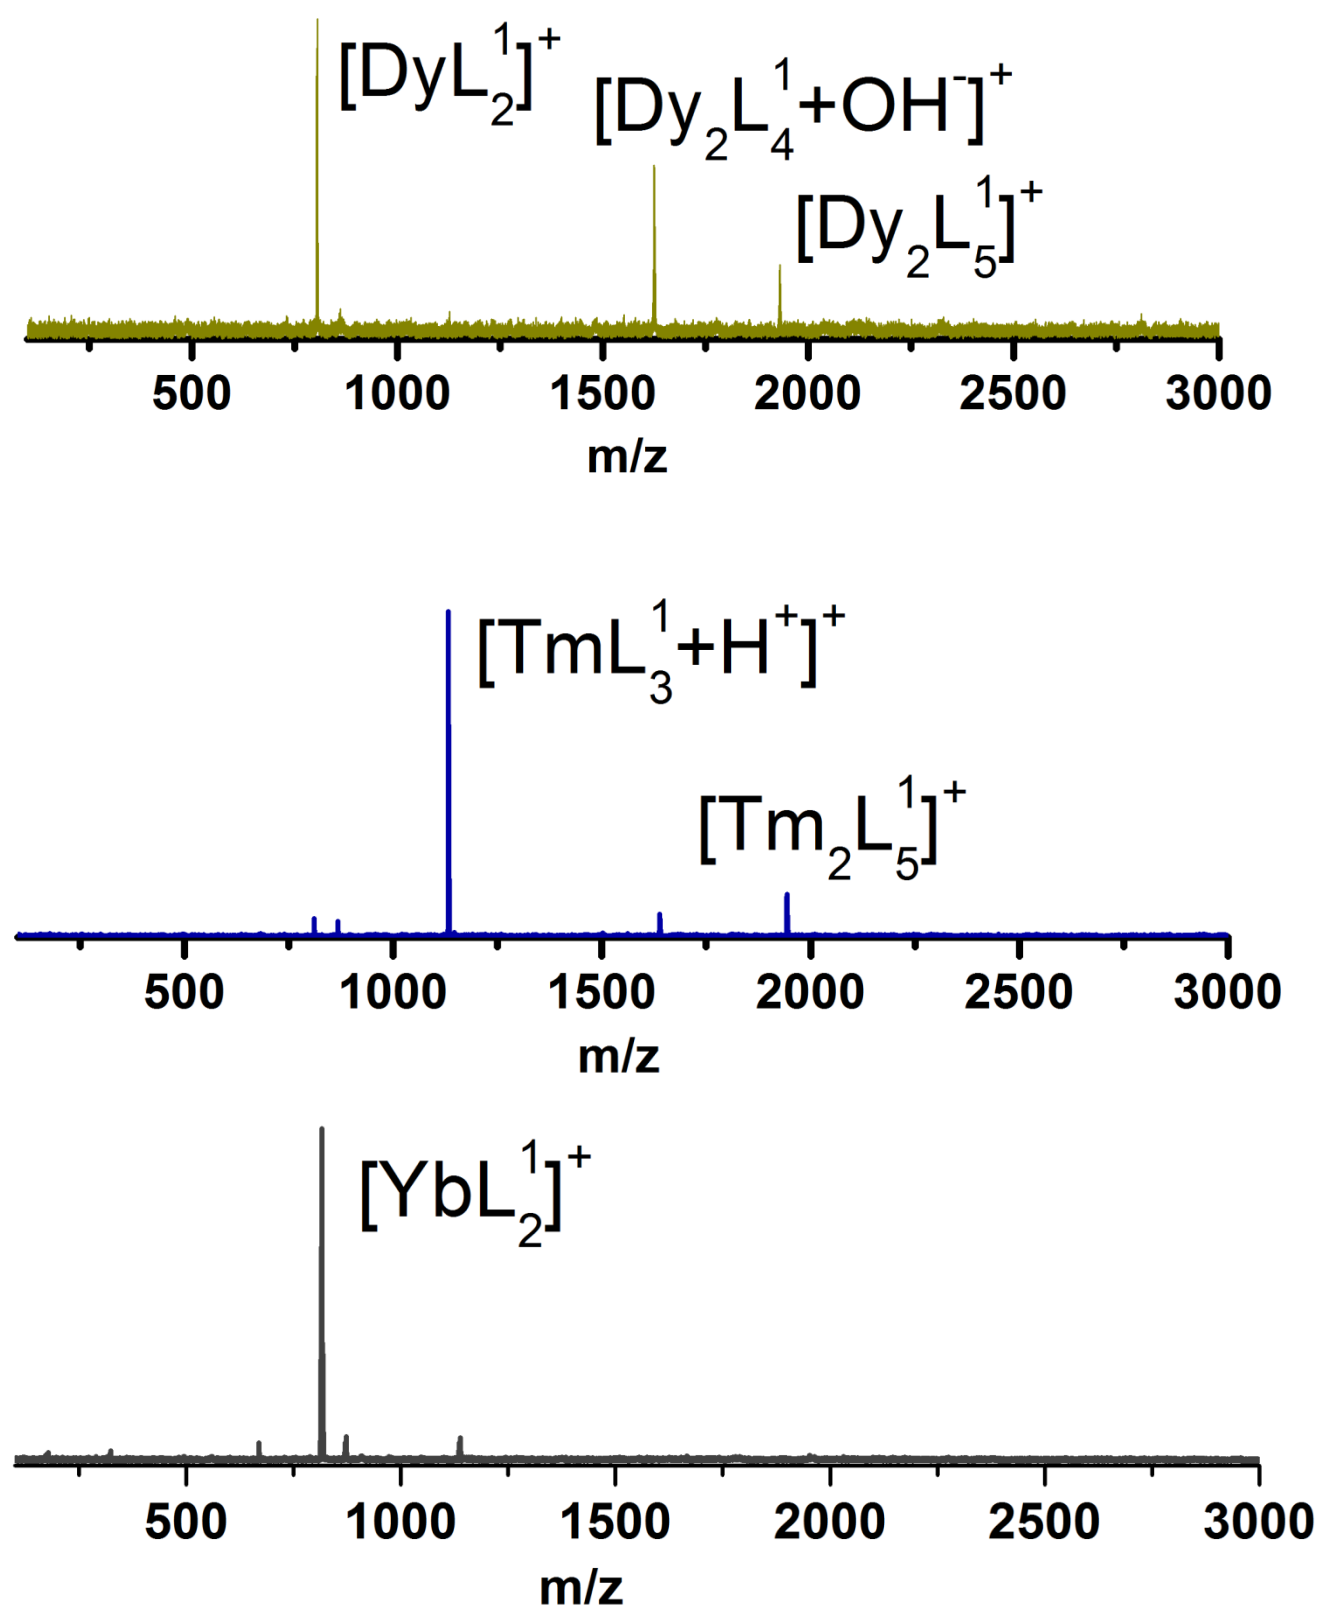

Fig.S2. LDI-TOF spectra of  $\text{DyL}_3^1$  (above),  $\text{TmL}_3^1$  (middle) and  $\text{YbL}_3^1$  (below)

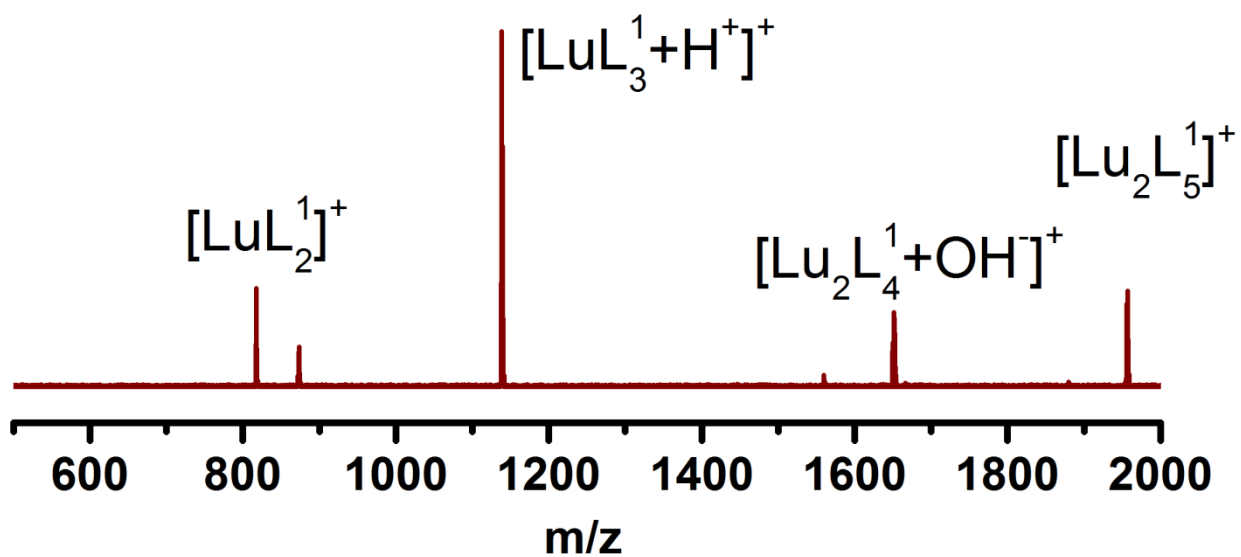

Fig.S3. LDI-TOF spectra of  $\text{LuL}_3^1$

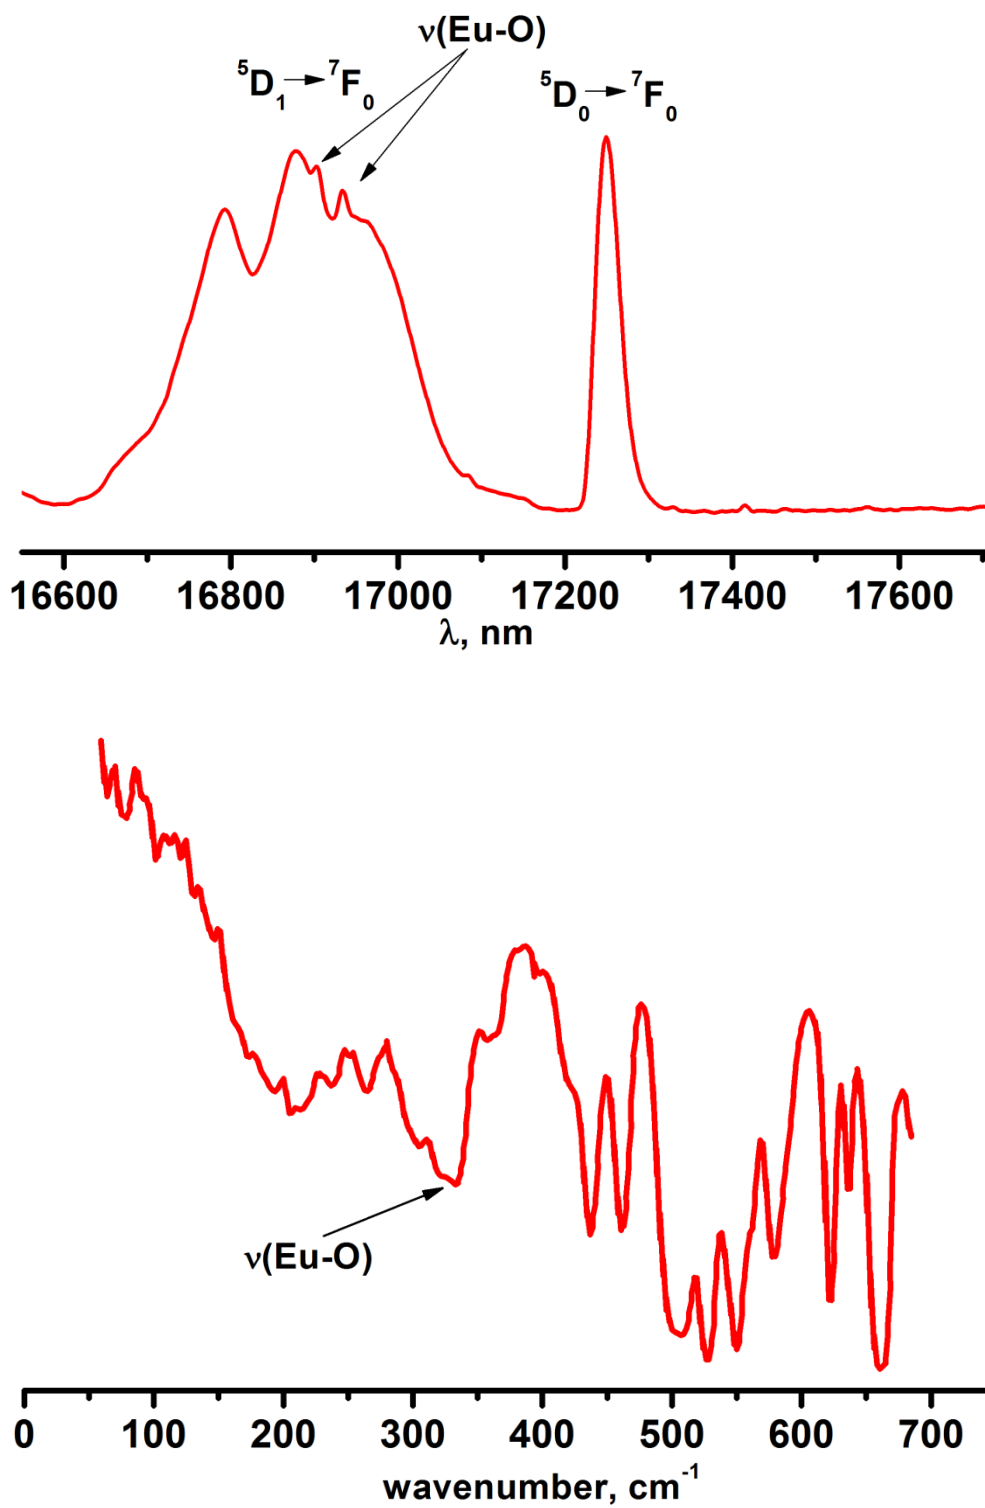

Fig. S4. Luminescence spectrum of  $\text{EuL}_3$  (above) and low-frequency IR spectrum of the same sample (below)

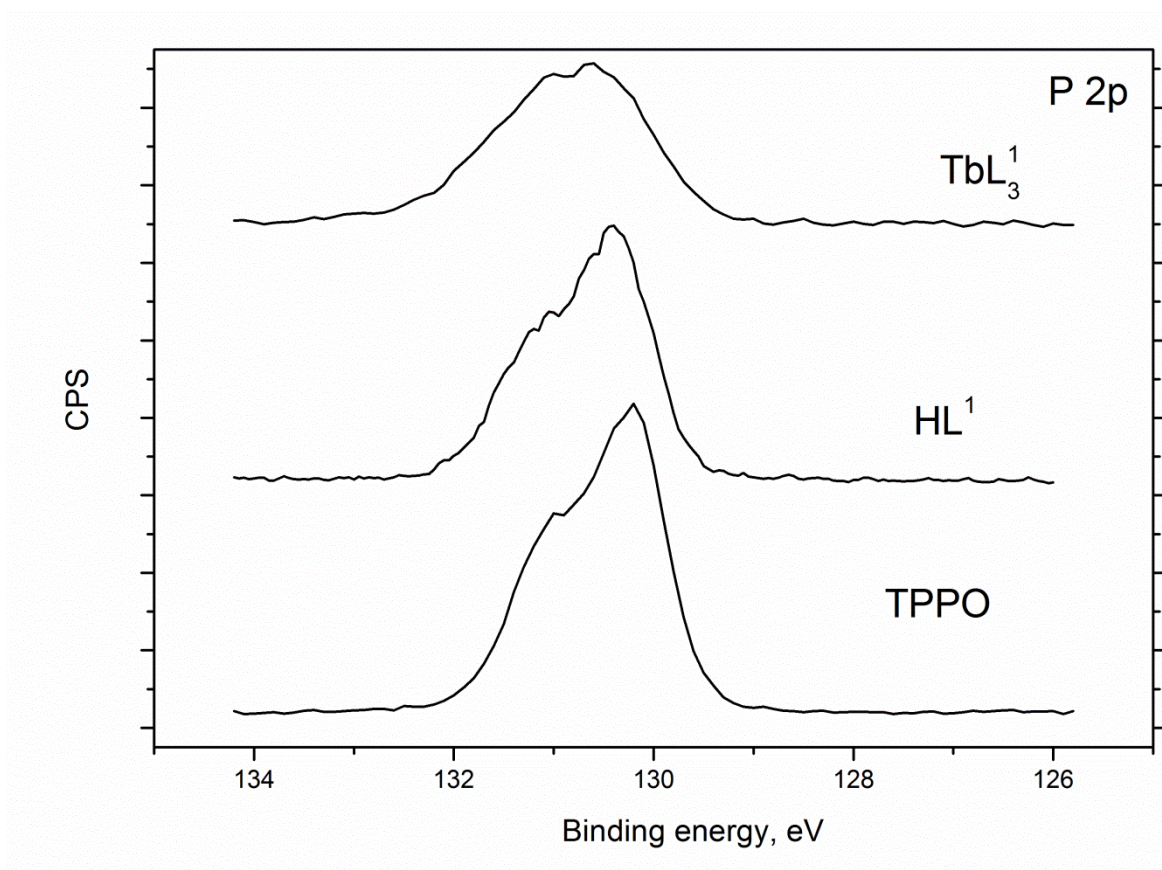

**Fig. S5.** P 2p photoelectron spectra of TPPO,  $\text{HL}^1$  and  $\text{TbL}_3^1$

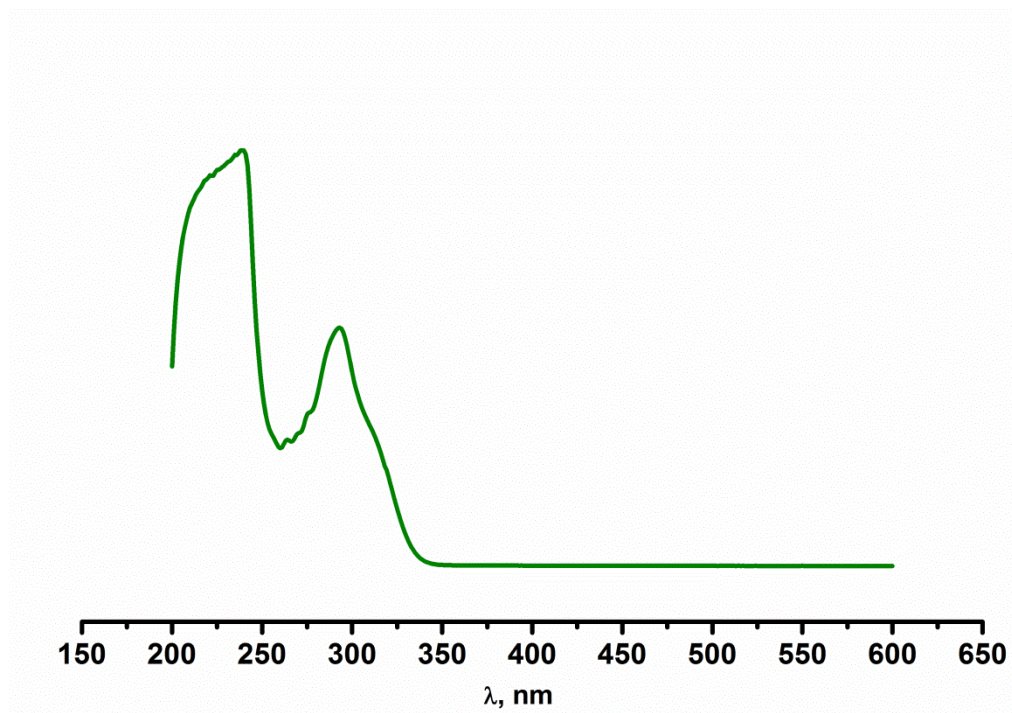

**Fig. S6.** Luminescence excitation spectrum of  $\text{TbL}_3^1$  in toluene.

## Sparkle PM3 calculations for $\text{EuL}_3^1$

**Table S1: Spherical Atomic Coordinates for the Sparkle/PM3 Coordination Polyhedron of monomeric complex  $\text{EuL}_3^1$ , Charge Factors ( $g$ ) and the Polarizability ( $\alpha$ ) of the Coordinated Atom**

| Atom         | $R/\text{\AA}$ | $\theta/^\circ$ | $\phi/^\circ$ | $g^a$  | $\alpha^a$               |
|--------------|----------------|-----------------|---------------|--------|--------------------------|
| O (Ligand 1) | 2.42154        | 75.305          | 143.746       | 0.0101 | $3.4640 \times 10^{-24}$ |
| O (Ligand 1) | 2.39837        | 53.831          | 217.024       | 0.0101 | $3.4640 \times 10^{-24}$ |
| O (Ligand 2) | 2.42407        | 107.924         | 47.329        | 0.0101 | $3.4640 \times 10^{-24}$ |
| O (Ligand 2) | 2.39866        | 44.171          | 19.932        | 0.0101 | $3.4640 \times 10^{-24}$ |
| O (Ligand 3) | 2.42240        | 111.168         | 300.280       | 0.0101 | $3.4640 \times 10^{-24}$ |
| O (Ligand 3) | 2.39648        | 161.624         | 215.132       | 0.0101 | $3.4640 \times 10^{-24}$ |

<sup>a</sup> Obtained using a nonlinear minimization technique.

**Table S2: Spherical Atomic Coordinates for the Sparkle/PM3 Coordination Polyhedron of dimeric complex  $\text{EuL}_3^1$ , Charge Factors ( $g$ ) and the Polarizability ( $\alpha$ ) of the Coordinated Atom**

| Atom         | $R/\text{\AA}$ | $\theta/^\circ$ | $\phi/^\circ$ | $g^a$  | $\alpha^a$               |
|--------------|----------------|-----------------|---------------|--------|--------------------------|
| O (Ligand 1) | 2.41271        | 80.716          | 121.674       | 0.0142 | $4.1236 \times 10^{-24}$ |
| O (Ligand 1) | 2.43465        | 122.602         | 66.263        | 0.0142 | $4.1236 \times 10^{-24}$ |
| O (Ligand 2) | 2.41926        | 141.641         | 216.443       | 0.0142 | $4.1236 \times 10^{-24}$ |
| O (Ligand 2) | 2.43605        | 77.344          | 205.992       | 0.0142 | $4.1236 \times 10^{-24}$ |
| O (Ligand 3) | 2.41735        | 19.676          | 280.456       | 0.0142 | $4.1236 \times 10^{-24}$ |
| O (Ligand 3) | 2.48857        | 60.321          | 23.278        | 0.0103 | $6.4998 \times 10^{-24}$ |
| O (Ligand 4) | 2.47074        | 108.337         | 326.986       | 0.0103 | $6.4998 \times 10^{-24}$ |

**Table S3. Calculated values of intramolecular energy transfer and back-transfer rates for Europium  $\text{EuL}_3^1$  compounds. The RL value is the distance from the donor state located at the organic ligands and the  $\text{Eu}^{3+}$  ion nucleus**

|                               | Ligand State<br>( $\text{cm}^{-1}$ ) | $\rightarrow$ | 4f – State<br>( $\text{cm}^{-1}$ ) | $R_L$<br>( $\text{\AA}$ ) | Transfer<br>Rate<br>( $\text{s}^{-1}$ ) | Back-Transfer<br>Rate<br>( $\text{s}^{-1}$ ) |
|-------------------------------|--------------------------------------|---------------|------------------------------------|---------------------------|-----------------------------------------|----------------------------------------------|
| Sparkle/PM3 Monomer Structure | Singlet<br>(34263.3)                 | $\rightarrow$ | $^5D_4(27586)$                     | 5.2602                    | $1.75 \times 10^3$                      | $2.16 \times 10^{-11}$                       |
|                               | Triplet (22501.3)                    | $\rightarrow$ | $^5D_1(19027)$                     | 4.9063                    | $7.98 \times 10^9$                      | $5.48 \times 10^2$                           |
|                               | Triplet (22501.3)                    | $\rightarrow$ | $^5D_0(17293)$                     | 4.9063                    | $5.62 \times 10^9$                      | $7.79 \times 10^{-2}$                        |
| Sparkle/PM3 Dimer Structure   | Singlet<br>(37633.2)                 | $\rightarrow$ | $^5D_4(27586)$                     | 5.0746                    | $6.72 \times 10^1$                      | $7.63 \times 10^{-20}$                       |
|                               | Triplet (23756.3)                    | $\rightarrow$ | $^5D_1(19027)$                     | 5.8775                    | $1.99 \times 10^9$                      | $3.27 \times 10^{-1}$                        |
|                               | Triplet (23756.3)                    | $\rightarrow$ | $^5D_0(17293)$                     | 5.8775                    | $1.04 \times 10^9$                      | $3.47 \times 10^{-5}$                        |

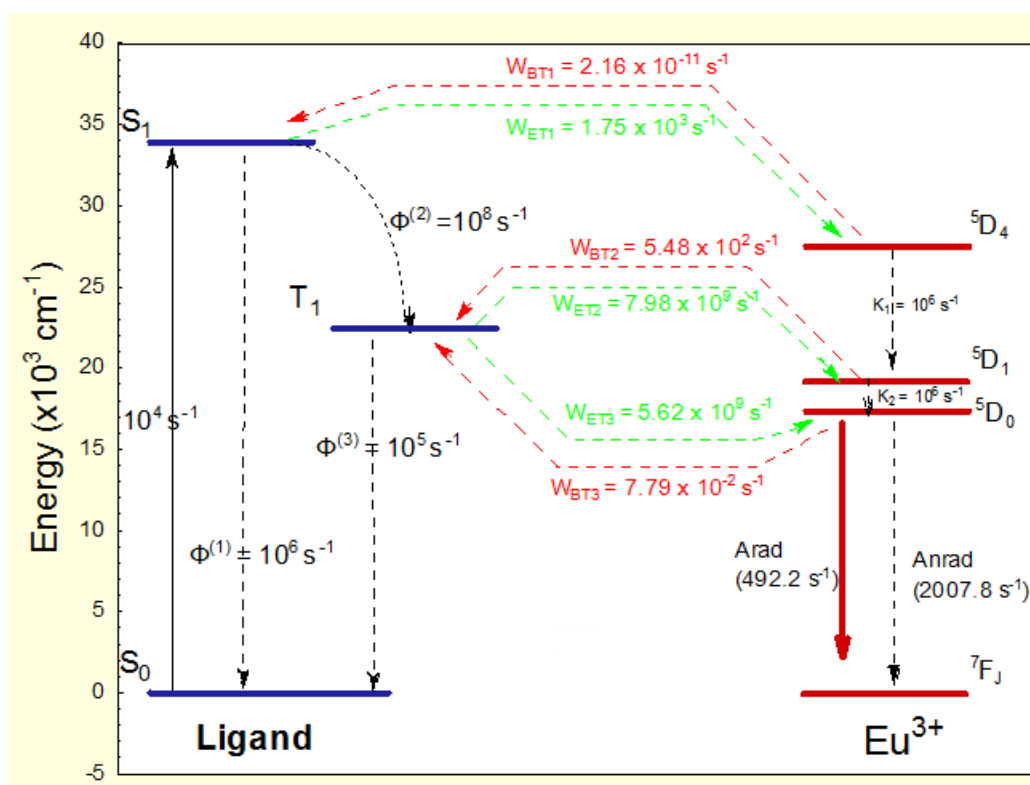

Fig.S7 Energy level diagram for  $\text{EuL}_3$  monomeric species showing the most probable channels for the intramolecular energy transfer process

### Sparkle PM3 calculations for $\text{EuL}_3$

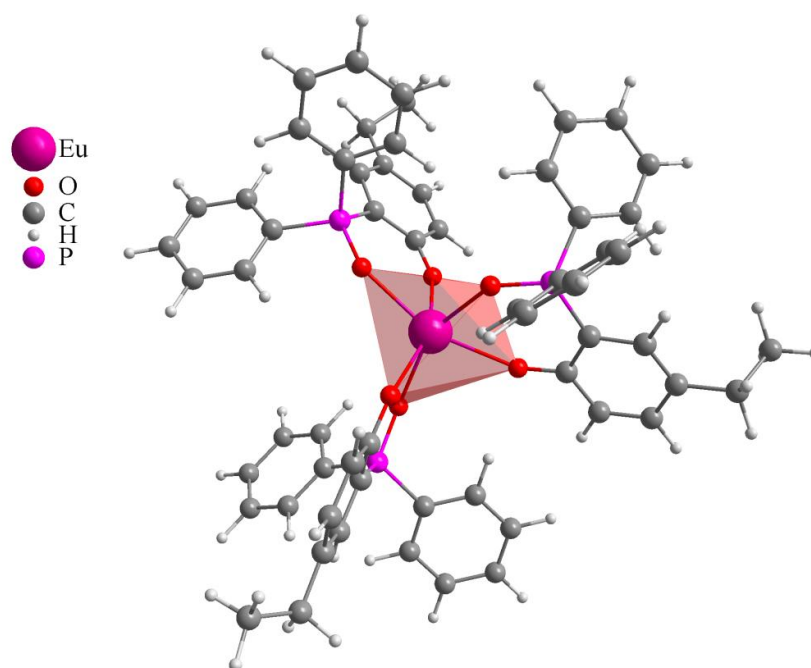

Fig.S8. Calculated ground state geometries of the monomeric molecular structure of  $\text{EuL}_3$  using the Sparkle/PM3 model

**Table S4: Spherical Atomic Coordinates for the Sparkle/PM3 Coordination Polyhedron of monomeric complex  $\text{EuL}^2_3$ , Charge Factors ( $g$ ) and the Polarizability ( $\alpha$ ) of the Coordinated Atom**

| Atom         | $R/\text{\AA}$ | $\theta/^\circ$ | $\phi/^\circ$ | $g^a$  | $\alpha^a$               |
|--------------|----------------|-----------------|---------------|--------|--------------------------|
| O (Ligand 1) | 2.42129        | 73.135          | 144.292       | 0.0104 | $3.2505 \times 10^{-24}$ |
| O (Ligand 1) | 2.39847        | 53.863          | 218.943       | 0.0104 | $3.2505 \times 10^{-24}$ |
| O (Ligand 2) | 2.42390        | 107.042         | 47.912        | 0.0104 | $3.2505 \times 10^{-24}$ |
| O (Ligand 2) | 2.39884        | 44.714          | 16.853        | 0.0104 | $3.2505 \times 10^{-24}$ |
| O (Ligand 3) | 2.42239        | 113.690         | 300.227       | 0.0104 | $3.2505 \times 10^{-24}$ |
| O (Ligand 3) | 2.39656        | 162.042         | 207.343       | 0.0104 | $3.2505 \times 10^{-24}$ |

<sup>a</sup> Obtained using a nonlinear minimization technique.

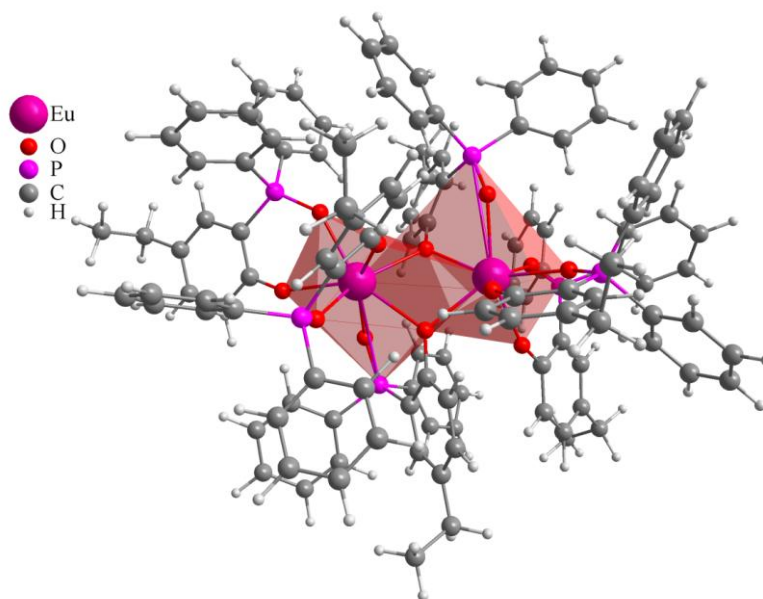

**Fig.S9. Calculated ground state geometries of the dimeric molecular structure of  $\text{EuL}^2_3$  using the Sparkle/PM3 model**

**Table S5: Spherical Atomic Coordinates for the Sparkle/PM3 Coordination Polyhedron of dimeric complex  $\text{EuL}^2_3$ , Charge Factors ( $g$ ) and the Polarizability ( $\alpha$ ) of the Coordinated Atom**

| Atom         | $R/\text{\AA}$ | $\theta/^\circ$ | $\phi/^\circ$ | $g^a$  | $\alpha^a$               |
|--------------|----------------|-----------------|---------------|--------|--------------------------|
| O (Ligand 1) | 2.40794        | 71.991          | 117.928       | 0.0137 | $4.0736 \times 10^{-24}$ |
| O (Ligand 1) | 2.43179        | 119.449         | 66.997        | 0.0137 | $4.0736 \times 10^{-24}$ |
| O (Ligand 2) | 2.41539        | 149.746         | 217.591       | 0.0137 | $4.0736 \times 10^{-24}$ |
| O (Ligand 2) | 2.43891        | 86.292          | 197.720       | 0.0137 | $4.0736 \times 10^{-24}$ |
| O (Ligand 3) | 2.41085        | 38.127          | 267.857       | 0.0137 | $4.0736 \times 10^{-24}$ |
| O (Ligand 3) | 2.47745        | 51.240          | 14.036        | 0.0101 | $6.4995 \times 10^{-24}$ |
| O (Ligand 4) | 2.47714        | 105.933         | 329.812       | 0.0101 | $6.4995 \times 10^{-24}$ |



**Table S6.** Calculated values of intramolecular energy transfer and back-transfer rates for Europium  $\text{EuL}_2^3$  compounds. The RL value is the distance from the donor state located at the organic ligands and the  $\text{Eu}^{3+}$  ion nucleus

|                                 | Ligand State ( $\text{cm}^{-1}$ ) | $4f$ – State ( $\text{cm}^{-1}$ )   | $R_L$ (Å) | Transfer Rate ( $\text{s}^{-1}$ ) | Back-Transfer Rate ( $\text{s}^{-1}$ ) |
|---------------------------------|-----------------------------------|-------------------------------------|-----------|-----------------------------------|----------------------------------------|
| Sparkle/PM3 Monomeric Structure | Singlet (33037.8)                 | $\rightarrow$ $^5\text{D}_4(27586)$ | 5.2752    | $4.49 \times 10^3$                | $1.99 \times 10^{-8}$                  |
|                                 | Triplet (21417.3)                 | $\rightarrow$ $^5\text{D}_1(19027)$ | 5.0543    | $1.07 \times 10^{10}$             | $1.34 \times 10^5$                     |
|                                 | Triplet (21417.3)                 | $\rightarrow$ $^5\text{D}_0(17293)$ | 5.0543    | $9.68 \times 10^9$                | 24.60                                  |
| Sparkle/PM3 Dimeric Structure   | Singlet (39914.2)                 | $\rightarrow$ $^5\text{D}_4(27586)$ | 4.7630    | 5.07                              | $9.96 \times 10^{-26}$                 |
|                                 | Triplet (23379.7)                 | $\rightarrow$ $^5\text{D}_1(19027)$ | 5.4132    | $3.45 \times 10^9$                | 3.47                                   |
|                                 | Triplet (23379.7)                 | $\rightarrow$ $^5\text{D}_0(17293)$ | 5.4132    | $1.98 \times 10^9$                | $4.02 \times 10^{-4}$                  |

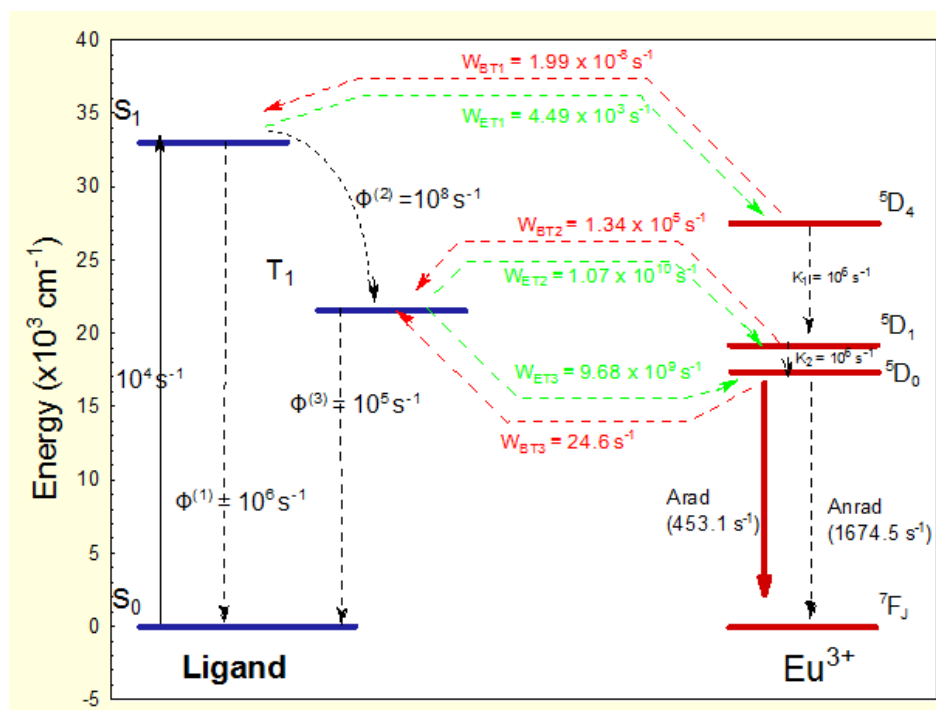

**Fig.S10** Energy level diagram for  $\text{EuL}_2^3$  monomeric species showing the most probable channels for the intramolecular energy transfer process

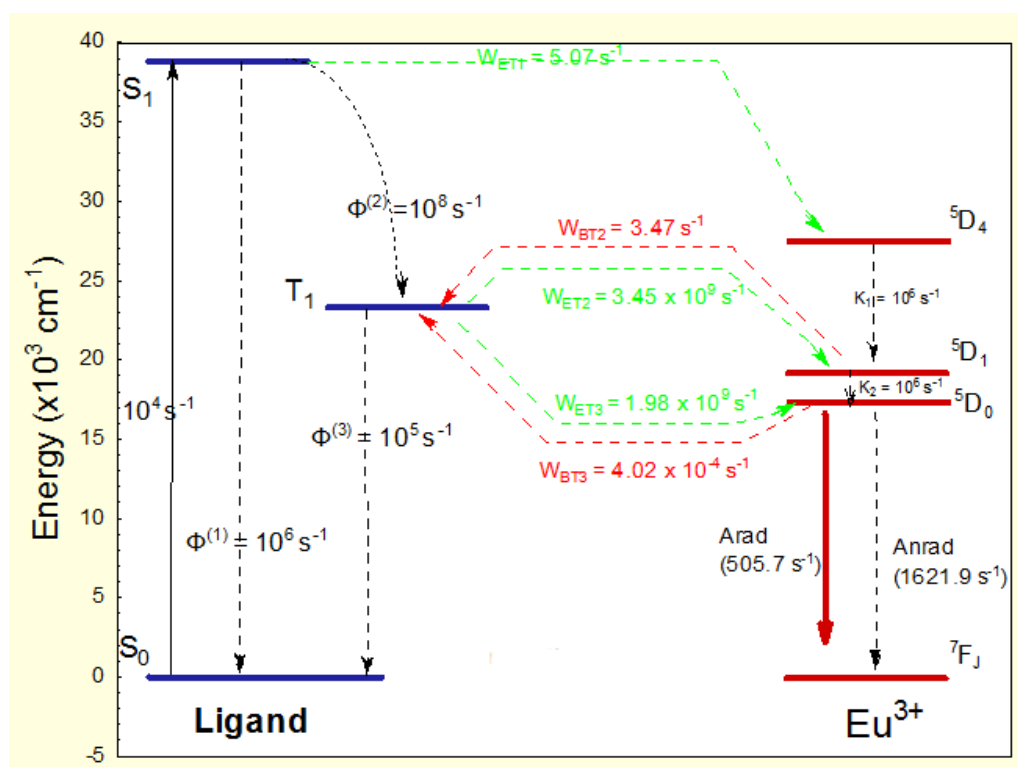

Fig.S11 Energy level diagram for EuL<sub>3</sub> dimeric species showing the most probable channels for the intramolecular energy transfer process

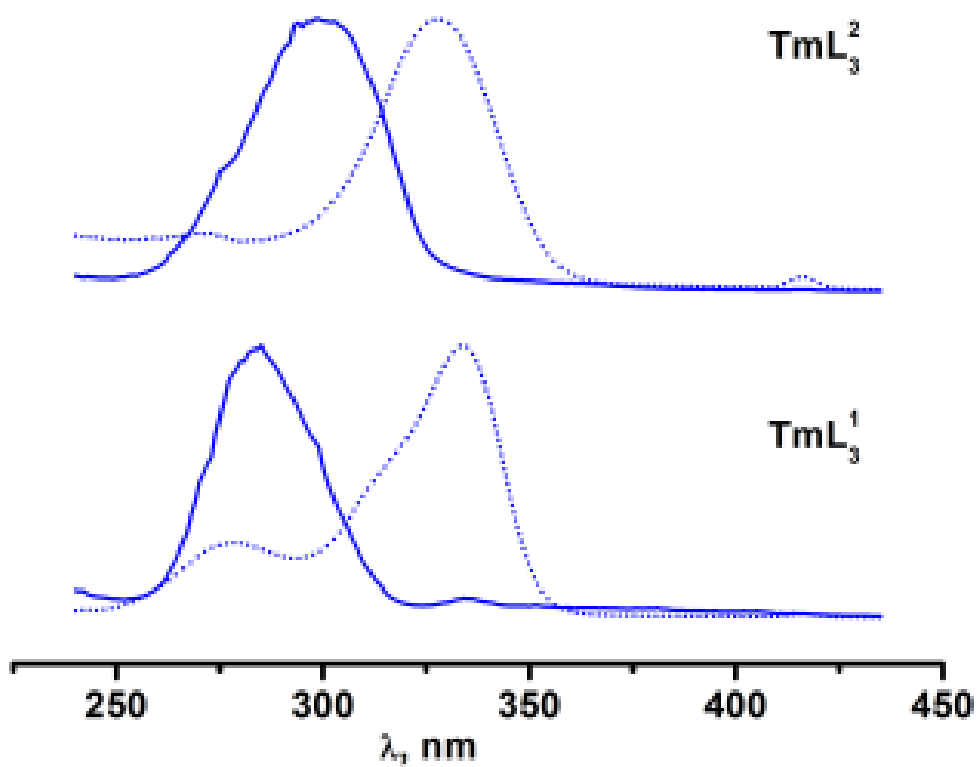

Fig.S12. Excitation luminescence spectra taken at 298 K (solid line) and 77 K (dotted line)
